# Supplementary material for: CD9, a potential leukemia stem cell marker, regulates drug resistance and leukemia development in acute myeloid leukemia
Source: Research Square preprint supplement (doi:10.21203/rs.3.rs-55355/v3), 2021-01-14
Supplement: Supplementary file 1 [file d0638769118b5df32a4ef1fe.xlsx]

## Sheet: Sheet1
Supplementary Tables
Table S1 Patient characteristics in this study
Patient No.	gender	FAB classification	Cytogenetic abnormality	BM CD9+%	BM CD9+/CD34+CD38-%
1	Male	M2	Complex	5.84	37.2
2	Female	unknown	NA	7.65	43.1
3	Female	M1	Normal	36	87.2
4	Male	unknown	NA	4.63	70.7
5	Male	unknown	NA	10.3	76.3
6	Male	M3	t(15; 17)	unknown	unknown
7	Male	M3	NA	unknown	unknown
8	Male	M2	NA	unknown	unknown
NA:not available
Table S2 Primes for Chromatin Immunoprecipitation in this study
Forward primer 1	5'-CTGGTAGCTCCCTGAAAGACTAGCTTG-3'
Reverse primer 1	5'-TGGCACCTGATCTCTCCCGGAA-3'
Forward primer 2	5'-GTCACTGAGGTCCCCACAAGC-3'
Reverse primer 2	5'-GAGCACACCTATATGCCGTCCT-3'
Table S3 The 23 genes were significantly upregulated in the MRD microarray
Entrez ID	HUGO gene symbol	chromosome	description	Class
9404	LPXN	11	leupaxin	Signaling molecule
719	C3AR1	12	complement component 3a receptor 1	Plasma membrane & Extracellular
1396	CRIP1	14	cysteine-rich protein 1 (intestinal)	Other
8900	CCNA1	13	cyclin A1	Cell cycle
9124	PDLIM1	10	PDZ and LIM domain 1	Other
7305	TYROBP	19	TYRO protein tyrosine kinase binding protein	Plasma membrane & Extracellular
10225	CD96	3	CD96 molecule	Plasma membrane & Extracellular
3956	LGALS1	22	Galectin 1	Signaling molecule
928	CD9	12	CD9 molecule	Plasma membrane & Extracellular
3055	HCK	20	hemopoietic cell kinase	Signaling molecule
6282	S100A11	1	S100 calcium binding protein A11	Signaling molecule
945	CD33	19	CD33 molecule	Plasma membrane & Extracellular
22898	DENND3	8	DENN/MADD domain containing 3	Other
8942	KYNU	2	kynureninase (L-kynurenine hydrolase)	Other
4542	MYO1F	19	myosin IF	Other
2207	FCER1G	1	Fc fragment of IgE, high affinity I, receptor for; gamma polypeptide	Plasma membrane & Extracellular
9450	LY86	6	lymphocyte antigen 86	Secreted
240	ALOX5	10	arachidonate 5-lipoxygenase	Other
10161	P2RY5	13	purinergic receptor P2Y, G-protein coupled, 5	Plasma membrane & Extracellular
10437	IFI30	19	interferon, gamma-inducible protein 30	Plasma membrane & Extracellular
4332	MNDA	1	myeloid cell nuclear differentiation antigen	Other
4068	SH2D1A	X	SH2 domain protein 1A	Other
4688	NCF2	1	neutrophil cytosolic factor 2	Other
